1    **Title**

2    Occurrence of human infection with *Salmonella* Typhi in sub-Saharan Africa.

3

4    **Authors**

5    Jong-Hoon Kim, Prerana Parajulee<sup>1</sup>, Thuy Tien Nguyen, Shreeya Wasunkar, Vittal Mogasale<sup>1</sup>,

6    Se Eun Park<sup>1,2</sup>, Ursula Panzner, Ondari D. Mogeni<sup>1</sup>, Justin Im<sup>1</sup>, and Florian Marks<sup>1,3,4</sup>

7

8    **Affiliations**

9    <sup>1</sup> International Vaccine Institute, Seoul, Republic of Korea

10   <sup>2</sup> Graduate School of Public Health, Yonsei University, Seoul, Republic of Korea

11   <sup>3</sup> University of Antananarivo, Antananarivo, Madagascar

12   <sup>4</sup> Cambridge Institute of Therapeutic Immunology and Infectious Disease, University of

13   Cambridge

14

15   \*Corresponding author: [jonghoon.kim@ivi.int](mailto:jonghoon.kim@ivi.int)

16

17

18

19

20

21

22

23

24

25

26

27

28

29

30

31

32

33

34

35

36

37

38 **Abstract**

39 Typhoid fever, caused by *Salmonella enterica* serovar Typhi, results in over 1.2 million cases  
40 and 29 thousand deaths annually from sub-Saharan Africa. Combating this disease requires  
41 various intervention approaches, such as typhoid conjugate vaccines and improving water,  
42 sanitation, and hygiene. Enhancing the effectiveness of these strategies necessitates a  
43 deeper understanding of the variation of the typhoid fever across the target region.  
44 Although the magnitude and variation of typhoid fever at the country level have been  
45 studied globally, sub-national variation remains underexplored. To address this gap, we  
46 collected data from 265 published reports on typhoid fever occurrences in sub-Saharan  
47 Africa between January 2000 and December 2020. The dataset includes information on the  
48 year and geographical location of observation, diagnostic tests used, and the type of studies  
49 in which typhoid fever was reported. By analyzing this dataset, we can gain insights into the  
50 sub-national heterogeneity of typhoid fever's burden in the region. This knowledge will be  
51 instrumental in designing more effective intervention strategies to combat the disease.

52

53

54

55

56

57

58

59

60

61

62

## 63 **Background & Summary**

64 Typhoid fever is a systemic bacterial infection caused by *Salmonella enterica* serovar Typhi  
65 (*Salmonella* Typhi or *S. Typhi*). Patients usually present sustained fever (39-40°C) and other  
66 symptoms include weakness, stomach pain, headache, diarrhea or constipation, cough, and  
67 loss of appetite. Severe forms of illness include ileal perforation, which can lead to death. *S.*  
68 Typhi is transmitted via fecally-contaminated food and water and the majority of typhoid  
69 fever incidence is known to occur in low- and middle-income countries (LMIC)<sup>1-6</sup>.

70

71 Globally, typhoid fever causes estimated 12 million cases and 130 thousand deaths according  
72 a recent modelling study in which incidence rate data come from population-based  
73 longitudinal surveillance studies conducted at 22 sites in 14 different countries between  
74 1978 and 2017.<sup>1</sup> Earlier estimates of the global burden of typhoid fever were based on a  
75 relatively simplistic approach of extrapolating the incidence rates observed in one setting to  
76 the entire country or to neighbouring countries where data is unavailable<sup>2-4</sup>. However, the  
77 surveillance is often conducted at sites where the disease incidence has already been  
78 reported and therefore would not necessarily well represent the country<sup>5</sup>. Later studies used  
79 sophisticated modelling techniques to adjust observed values using the distribution of  
80 geospatial variables that potentially affect the transmission of typhoid fever rather than  
81 simple extrapolation<sup>1,6</sup>.

82

83 While they clearly show variation at the country level, existing studies fail to emphasize that  
84 the burden of typhoid fever also shows significant sub-national variation for each country.  
85 Outbreaks often show district-level variation of typhoid incidence<sup>7-9</sup> and country-level  
86 surveys show sub-national heterogeneity of incidence<sup>10-13</sup>. Understanding idiosyncratic  
87 behaviour of typhoid transmission between communities will be critical for a country to  
88 implement intervention programs such as campaign vaccination against endemic or

89 epidemic typhoid fever more efficiently and effectively. Efficiency and effectiveness of an  
90 intervention program can improve, for instance, if the interventions are targeted on high-  
91 burden areas. Identifying those high-burden areas will depend on how well we understand  
92 the spatial variation of the burden of typhoid fever across the target country.

93

94 Although population-based prospective studies serve as the basis for existing estimates of  
95 country-level and global burden of typhoid fever, report of sporadic cases and outbreaks  
96 provide wider spatial coverage and hold information on sub-national variation of occurrence  
97 of typhoid fever<sup>14</sup>. In this study, we provide the data set on the occurrence of typhoid fever  
98 extracted from peer-reviewed literature. We focus on sub-Saharan Africa, where systematic  
99 surveillance has shown that the burden is substantial<sup>1,2,5,6</sup>. The dataset we report provides  
100 information on the occurrence of typhoid fever at the hospital, or district or higher sub-  
101 national administrative units. These datasets provide opportunities to better understand  
102 sub-national variation of the occurrence of typhoid fever.

103

## 104 **Methods**

### 105 *Search and Data Sources*

106 Data on the occurrence of typhoid fever were extracted from peer-reviewed research  
107 articles indexed in PubMed or Embase published between January 1, 2000 and October 31,  
108 2020. Systematic review of the literature followed a standard procedure and the overview  
109 of the procedure in a Preferred Reporting Items for Systematic Reviews and Meta-Analyses  
110 (PRISMA) flow diagram (**Figure 1**). The search term used for querying PubMed and Embase  
111 was designed to capture different uses of typhoid fever in the literature such as typhoid  
112 fever, *Salmonella typhi*, *S. Typhi*, or enteric fever and limit to the countries from sub-Saharan  
113 Africa. The exact search terms appear in the Supplement.

### 114 *Eligibility Criteria and Study Selection*

115 A study, regardless of study types, was eligible for inclusion in this analysis if it clearly reports  
116 date and location of occurrence as well as diagnostic method used for confirmation of the  
117 occurrence of human typhoid cases. We included reports of polymerase chain reaction (PCR)  
118 or culture-confirmed typhoid fever where *S. Typhi* was isolated from normally sterile sites  
119 such as blood, urine, bone marrow, or cerebrospinal fluid. We also included studies that  
120 confirm typhoid fever through serologic tests (e.g., Widal test or enzyme-linked  
121 immunosorbent assay [ELISA]) or suspected clinically (e.g., ileal perforation) while  
122 acknowledging that those case definitions are less reliable compared with culture or PCR  
123 confirmation. We excluded the studies that are based on the analyses of existing data and do  
124 not report novel occurrence of typhoid fever in humans. For instance, some articles report  
125 results of experiments using the existing isolates (e.g., susceptibility to antimicrobials or  
126 other medicinal plants) and were therefore excluded. Other studies fail to provide serovars  
127 while reporting infection *Salmonella*.

128

#### 129 *Data Extraction, Study Variables, and Analytic Approach*

130 Two authors (J-HK and PP) reviewed the literature and extracted the data. Where there was  
131 discordance among the two reviewers, the first author decided after discussions. Extracted  
132 data included year of observation, location (smallest sub-national area possible), diagnostic  
133 method, and the number of typhoid cases reported. In reports of typhoid cases from  
134 observations that span multiple years without further details broken down by year, we  
135 assumed that at least 1 episode of typhoid fever case occurred each year. We defined a  
136 typhoid fever occurrence as a report of at least 1 episode of typhoid fever excluding any  
137 duplicate reports from the same cohort. For imported cases, we assumed that the typhoid  
138 episode occurred in the country in which the infection occurred according to the report. If  
139 the imported cases led to local transmission, we assumed that typhoid occurred in both the

140 country of infection origin and the country of report. An outbreak was defined based on the  
141 definition used in the report.

142

## 143 **Data Records**

144 Occurrence data were stored in an Excel spreadsheet where each row indicates an  
145 occurrence event of typhoid fever for specific year and location. Some occurrence events  
146 reported from a larger region may overlap those from smaller sub-regions within a region.  
147 Columns indicate data source (e.g., title of the article), years of observation and report,  
148 diagnostic method, number of cases reported, sub-national region (up to the smallest units  
149 available), study type, longitude and latitude which were acquired through Google Map.  
150 Locations may refer to the arbitrary central point of the region (e.g., neighbourhoods,  
151 village) or the location of a healthcare facility. Study types were categorized into review of  
152 hospital records, case report, outbreak reports, and longitudinal studies. The dataset is  
153 available at the GitHub repository of the first author.<sup>15</sup>

154

## 155 **Technical Validation**

156 We provide an overview of the included studies by country and year of publication. Also, we  
157 provide more details on the diagnostic methods used to confirm the infection, types of  
158 studies in which typhoid fever were reported, year, and sub-national location of occurrence  
159 of typhoid fever.

160

### 161 Frequency of studies by year and country

162 Occurrence of confirmed typhoid fever were reported in 31 countries from Jan 2000 to Dec  
163 2020 with overall reporting frequency increasing over time (**Figure 2A**). The number of  
164 reports varies by study and year of publication (**Figure 2B**) and by year in which the study  
165 began (**Figure 2C**) considerably. Nigeria consistently reported the highest number of reports

166 on the occurrence of typhoid fever over the period. For countries like Angola, Benin,  
167 Burundi, Guinea-Bissau, Liberia, Madagascar, Niger, Uganda, Zambia and Zimbabwe, typhoid  
168 fever has been reported after 2010 considering the period from 2000 to 2020.

#### 169 Diagnostic methods

170 We categorized the studies based on the diagnostic method employed to identify typhoid  
171 fever (**Table 1**). In instances where a single study utilized multiple diagnostic methods (e.g.,  
172 clinical criteria, blood culture, and bone marrow sample culture), we prioritized the method  
173 with the higher performance. Specifically, if the study included the method such as the  
174 culture of bone marrow or cerebrospinal fluid samples, which is recognized as the highest  
175 sensitivity, we selected this method as the representative method of the study. Similarly, a  
176 study incorporated blood culture but did not included methods like the bone marrow  
177 culture, we chose the blood culture as the representative diagnostic method. If the methods  
178 included other culture methods, we chose the methods in the order of culture of urine  
179 samples, culture of stool samples, and culture of other body fluids. Other studies did not  
180 specifically mention the samples used to culture but implied the culturing method (e.g.,  
181 "bacterial isolation" or "microbiologically confirmed"). In this case, we created a category  
182 called "Culture". For studies whose diagnostic methods do not include culturing method, we  
183 chose the method in an order of Rapid tests, Widal, biochemical tests, and clinical  
184 symptoms. While we sought to categories by the precision of the tests, this category maybe  
185 somewhat arbitrary. The reader can access the original terms that indicated multiple  
186 methods used for each study.

187

188 According to this categorization, studies based on culturing blood samples were most  
189 frequent ( $n=99$ , 37.4%). (**Table 1**) while still numerous studies relied on less reliable  
190 methods, which include clinical signs (e.g., ileal perforation) ( $n=71$ , 26.8%) or Widal test (or  
191 agglutination) ( $n=36$ , 13.6%).

192

### 193 Study types

194 Study design was diverse and included case reports, outbreak investigation, cross-sectional  
195 studies, retrospective studies (i.e., review of hospital records), and prospective studies  
196 including multi-year longitudinal surveillance studies. While population-based longitudinal  
197 surveillance studies can provide incidence rates of typhoid fever, they are few (n = 5) and  
198 were conducted around 15 sub-national areas of 10 countries (**Table 2**). On the other hand,  
199 there are other studies that report occurrence of typhoid fever and wider spatial coverage in  
200 the dataset. Prospective studies including clinical trials were most common (n=212),  
201 followed by retrospective (n=144), cross-sectional (n=48), outbreak investigation (n=26),  
202 case report (n=26), and case-control (n=13) studies.

203

### 204 Geographical locations

205 Occurrence data cover entire continent although occurrences are more frequent in East and  
206 West Africa. Top three countries in terms of the number of unique 20 km by 20 km grids  
207 where the occurrence was reported were Nigeria (n=85), Kenya (n=24), and Tanzania (n=23)  
208 (**Figure 3A-D**). Sub-national locations in the dataset includes household, primary clinic,  
209 tertiary hospitals, district, or provinces. Except for the household locations (n=180),  
210 occurrence of typhoid fever has been reported in small number of large hospitals and cities  
211 with substantial variation across countries. In Angola, National Institute of Public Health of  
212 Angola located in the Capital city, Luanda is the only place in which blood culture-confirmed  
213 typhoid fever was reported. On the other hand, more than 55 health centers and hospitals  
214 spread out through the country.

215

### 216 **Code Availability**

217 All the codes used to generate the figures and tables are available in the GitHub repository <sup>15</sup>



## 218 **Funding**

219 This work was supported, in whole or in part, by Gavi, the Vaccine Alliance, and the Bill &  
220 Melinda Gates Foundation, via the Vaccine Impact Modelling Consortium (Grant Number  
221 OPP1157270 / INV-009125) and the Severe Typhoid Fever in Africa Program (Grant Number  
222 OPP1127988). The funders were not involved in the study design, data analysis, data  
223 interpretation, and writing of the manuscript. The authors alone are responsible for the  
224 views expressed in this article and they do not necessarily represent the decisions, policy, or  
225 views of their affiliated organizations.

226

## 227 **Author contributions**

228 J-HK designed the study, performed the literature search, reviewed the articles, extracted  
229 the data, and wrote the manuscript. PP reviewed the articles, extracted data, and reviewed  
230 the manuscript. All authors reviewed the final version of the manuscript and approved its  
231 submission.

232

## 233 **Competing interests**

234 There is no conflict of interest.

235

236

## 237 **Figures**

238

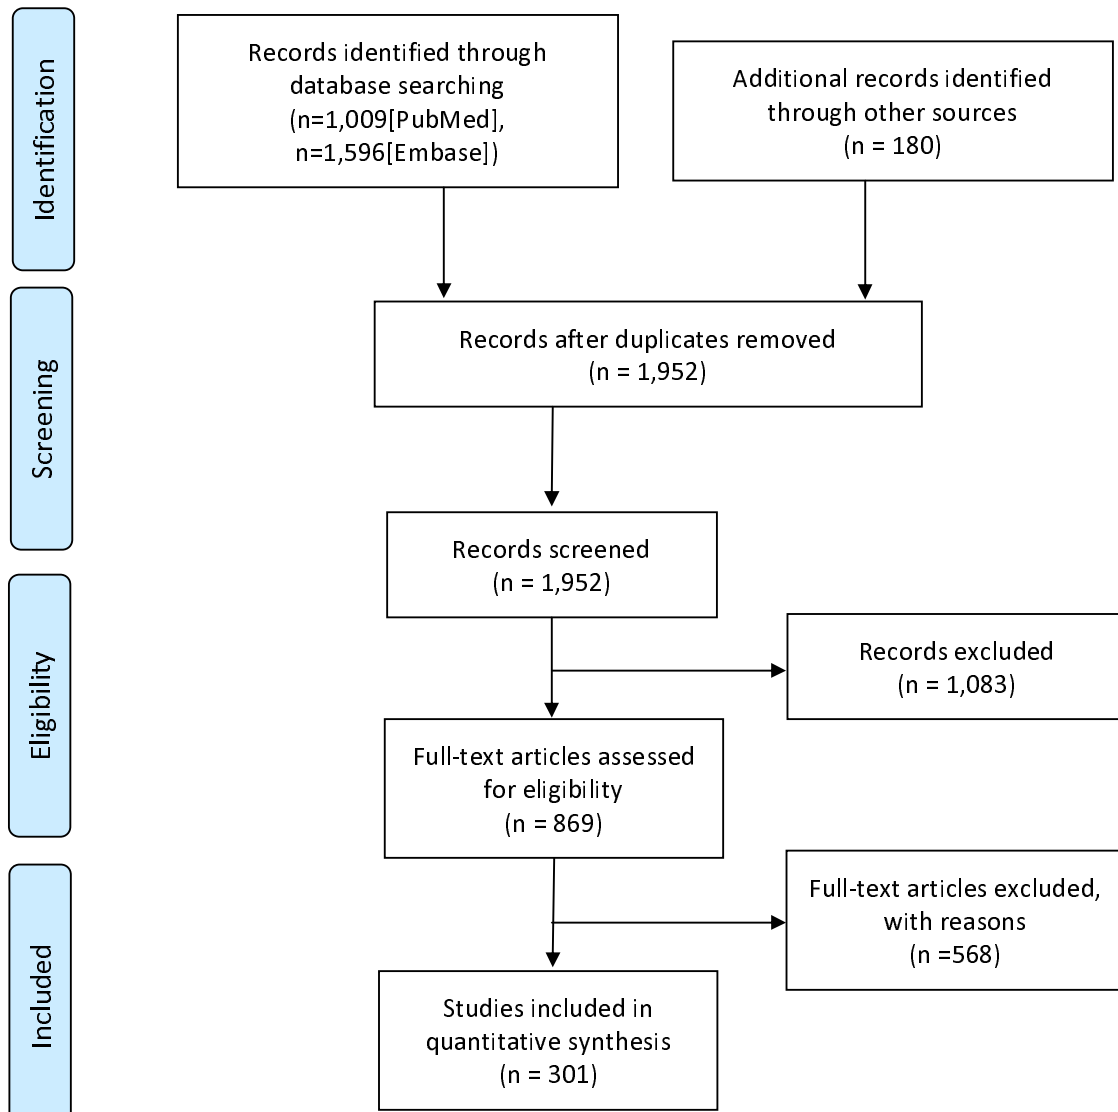

239 **Figure 1.** PRISMA flow diagram

240

241

242

243

244

245

246 **Figure 2.** Number of included reports by year and country. The overall number of reports of  
247 typhoid occurrence in sub-Saharan Africa increases over time (A) with the considerable  
248 variation by year of publication and country (B). The number of studies showed substantial  
249 variation also by country and the year in which the study began. CAR = Central African  
250 Republic

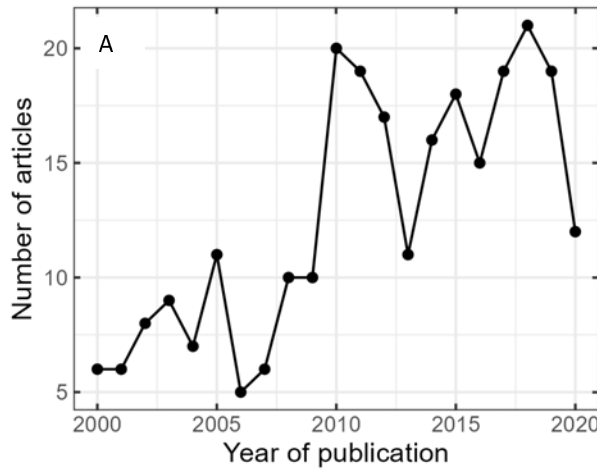

251

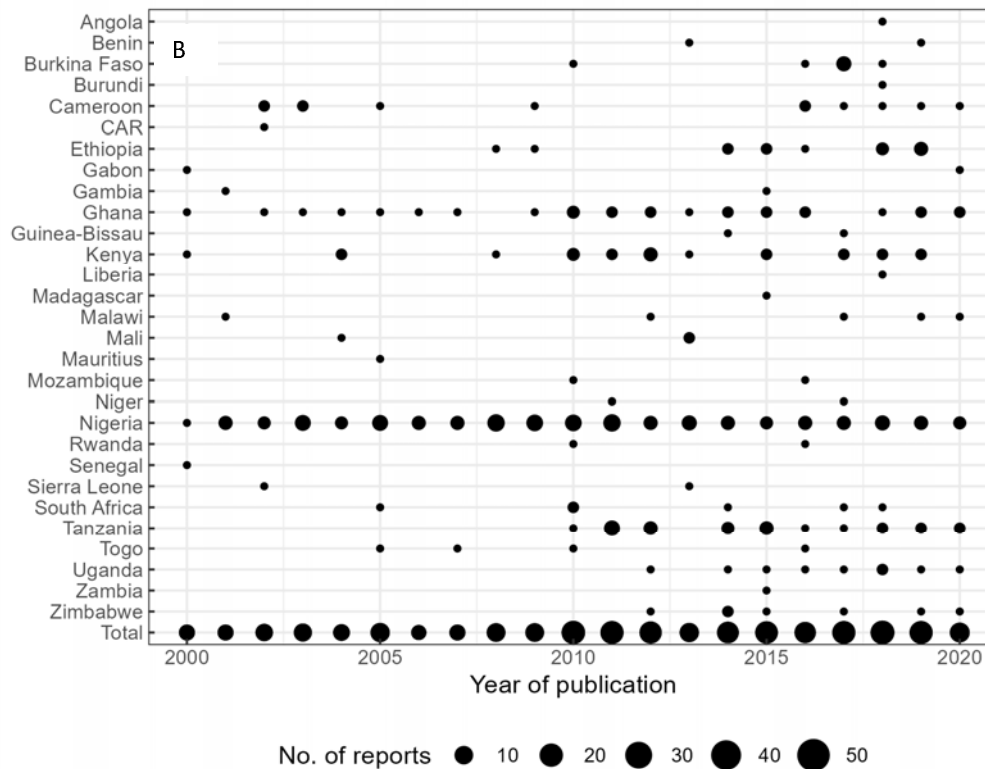

252

It is made available under a [CC-BY-NC-ND 4.0 International license](https://creativecommons.org/licenses/by-nc-nd/4.0/) .

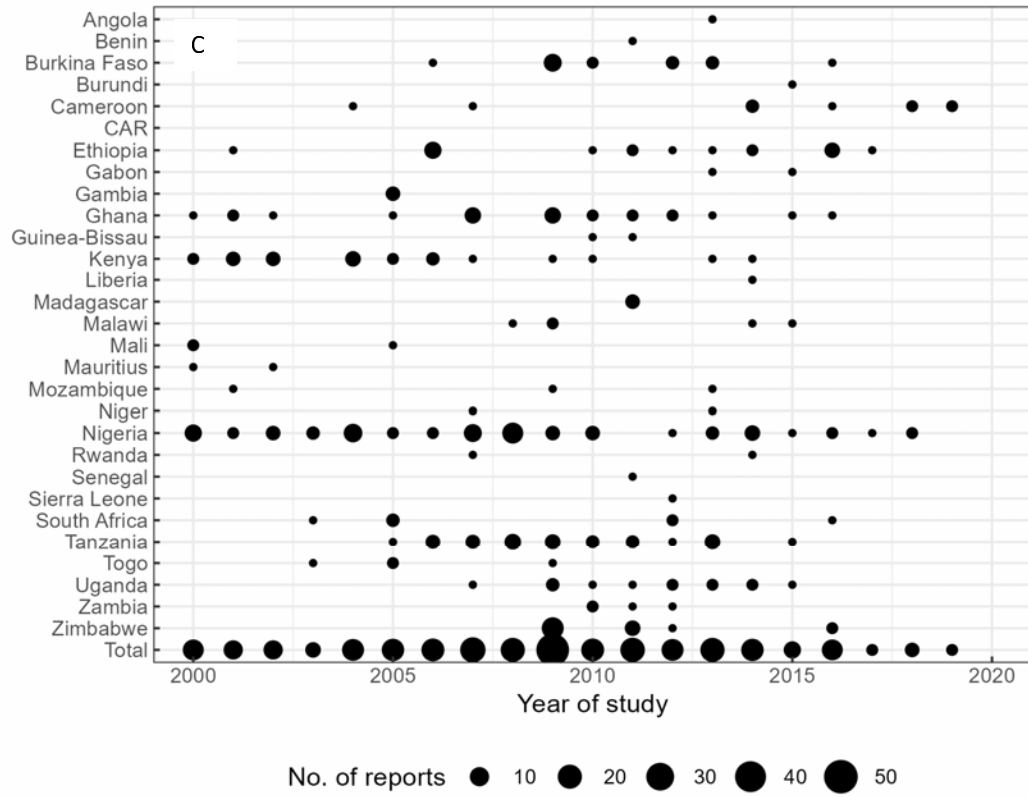

253

254

255

256

257

258

259

260

261

262

263

264

265

266

267

268

269

270

271

272

273

274

275

276

277

278

279

280 **Figure 3.** Geographical locations of occurrence of typhoid fever. The map has 20 km by 20  
281 km resolution. Red and blue grids represent location of typhoid fever confirmed through  
282 culture and other methods, respectively in Africa (A). (B), (C) and (D) represent Nigeria,  
283 Kenya, and Tanzania, respectively, in which typhoid occurrences were most frequently  
284 reported.

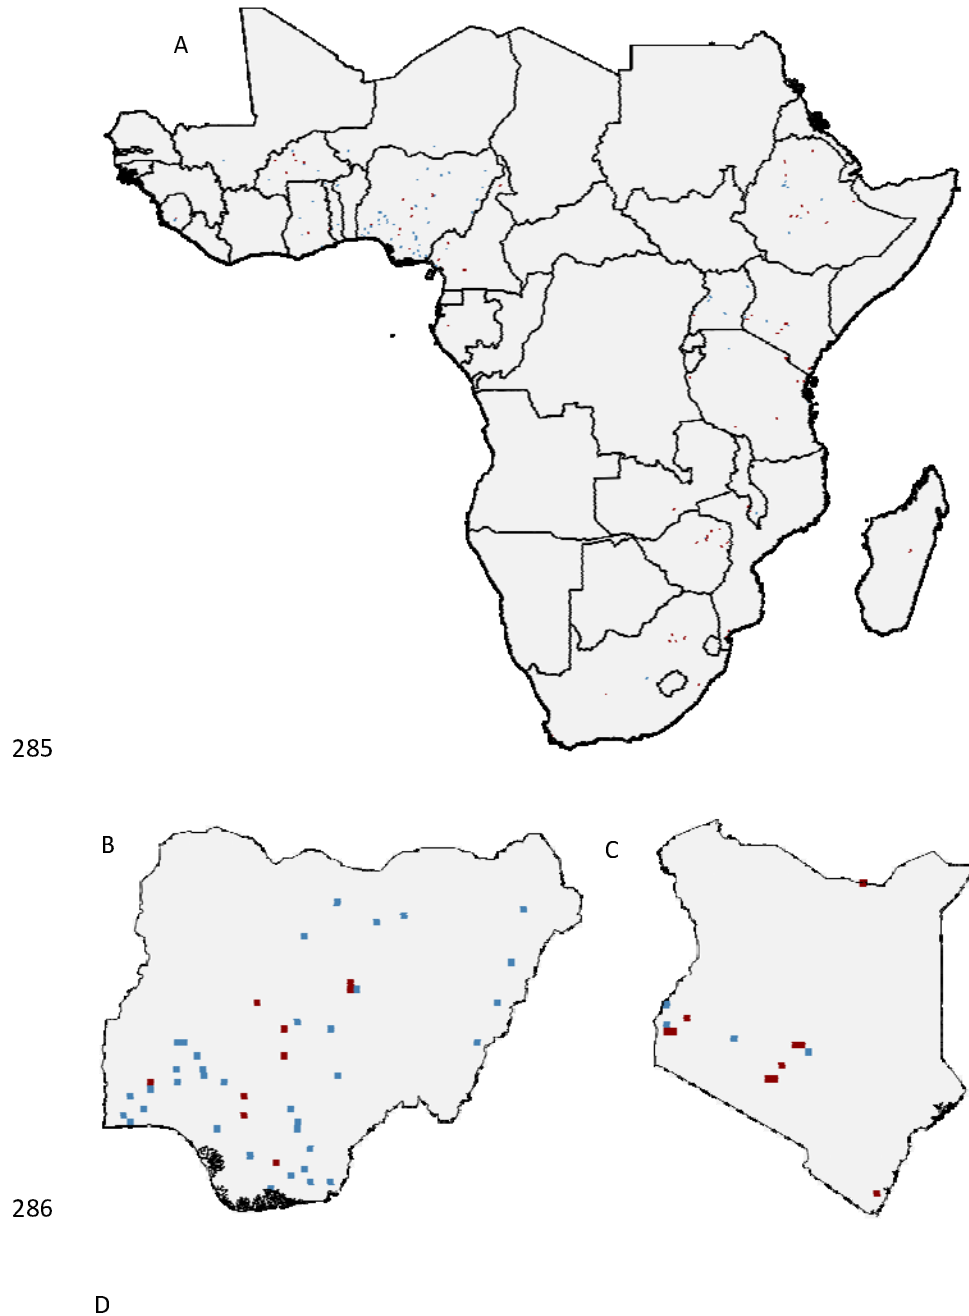

It is made available under a [CC-BY-NC-ND 4.0 International license](https://creativecommons.org/licenses/by-nc-nd/4.0/) .

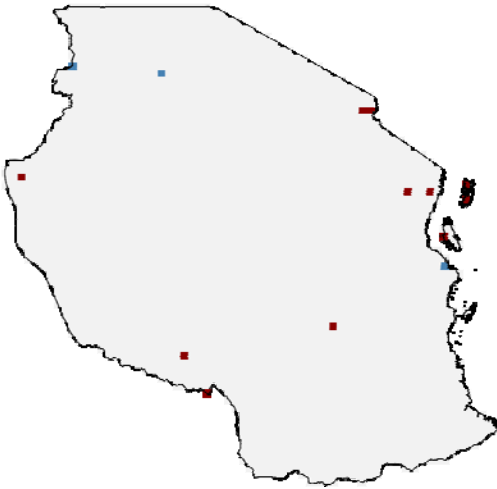

287

288

289

290

291

292

293

294

295

296

297

298

299

300

301

302

303

304

305

306

307

308

309

310

311

312

313

314

315

316

317

318

319

320

321 **Table 1.** Frequency of studies by diagnostic methods. CSF = Cerebrospinal fluid.

| Diagnostic method        | Frequency [n (%)] | Samples of actual terms used in the literature                                                                                                                                                                                                                                                                                                                                                                               |
|--------------------------|-------------------|------------------------------------------------------------------------------------------------------------------------------------------------------------------------------------------------------------------------------------------------------------------------------------------------------------------------------------------------------------------------------------------------------------------------------|
| Culture of blood samples | 99 (37.4)         | "urine, blood, or stool culture", "blood or stool culture, or Widal-Felix", "blood/urine/stool culture", etc.                                                                                                                                                                                                                                                                                                                |
| Clinical symptoms        | 71 (26.8)         | "typhoid perforation", "intestinal perforation", "clinical diagnosis", "digestive perforation", "typhoid gall bladder perforation", "cholecystitis", "clinical", "hospital record", "ileal perforation", "multiple jejunal perforations", "perforated enteritis", "peritonitis", "small bowel perforation", "enterocutaneous fistula", "septicaemia", "case files", "cases reported", "death records", "typhoid fever", etc. |
| Widal test               | 36 (13.6)         | "Widal test", "agglutination and titration (> 4-fold)", "Widal-Felix", "Widal and Weilfelix direct card agglutination tests (DCAT)", "Tube agglutination test", etc.                                                                                                                                                                                                                                                         |
| Culture of stool samples | 17 (6.4)          | "stool culture", etc.                                                                                                                                                                                                                                                                                                                                                                                                        |
| Culture                  | 14 (5.3)          | "Isolation of Salmonella typhi", "culture", "isolated", "bacterial isolation", "microbiologically confirmed", "laboratory confirmed", "confirmed", etc.                                                                                                                                                                                                                                                                      |
| Unclear                  | 11 (4.2)          | "Survey questionnaire", "surveillance data", "National Health Laboratory Services data", "standard methods with blood samples", "travel or tropical medicine clinics record", "history based on self report", "questionnaire",                                                                                                                                                                                               |

|                                  |         |                                                                                                                                                                                       |
|----------------------------------|---------|---------------------------------------------------------------------------------------------------------------------------------------------------------------------------------------|
|                                  |         | "report at medical record", "self reported"                                                                                                                                           |
| Culture of CSF samples           | 5 (1.9) | "cerebrospinal fluid culture", "spinal fluid culture",<br>"isolation from CSF, blood, or stool", etc.                                                                                 |
| Autopsy                          | 3 (1.1) | "post mortem report", "autopsy", "coroner's autopsies"                                                                                                                                |
| Culture of bone marrow samples   | 3 (1.1) | "blood, stool or bone marrow culture", "blood and bone marrow cultures", etc.                                                                                                         |
| Rapid test                       | 2 (0.8) | "rapid typhoid test", "Blood-RDT", "rapid diagnostic test",<br>"RDT", etc.                                                                                                            |
| Culture of other body fluids     | 1 (0.4) | "aspirates culture", "culture of pus", "wound culture",<br>"wound swab culture", "Ear and throat culture", "Sputum culture", "rectal swab specimens examined bacteriologically", etc. |
| Biochemical test                 | 1 (0.4) | "biochemical", "biochemical testing of urine sample",<br>"biochemical tests of environmental samples", etc.                                                                           |
| Culture of environmental samples | 1 (0.4) | "environmental sample culture", "S. typhi isolated from water"                                                                                                                        |
| Culture of urine samples         | 1 (0.4) | "urine culture"                                                                                                                                                                       |

322

323

324

325



326 Table 2. Population-based longitudinal surveillance of typhoid fever in sub-Saharan Africa  
327 since 2000  
328

| Country       | Sub-national region      | Surveillance period | Ref           |
|---------------|--------------------------|---------------------|---------------|
| Burkina Faso  | Nanoro, Boulkiemde       | 2013-2014           | <sup>16</sup> |
| Burkina Faso  | Nioko II, Polesgo        | 2012-2013           | <sup>5</sup>  |
| Ethiopia      | Butajira                 | 2012-2014           | <sup>5</sup>  |
| Ghana         | Asante Akim North        | 2007-2009           | <sup>17</sup> |
| Ghana         | Asante Akim North        | 2010-2012           | <sup>5</sup>  |
| Guinea-Bissau | Bandim                   | 2011-2013           | <sup>5</sup>  |
| Kenya         | Lwak, Kibera             | 2006-2009           | <sup>13</sup> |
| Kenya         | Kibera                   | 2012-2013           | <sup>5</sup>  |
| Madagascar    | Imerintsiatosika, Isotry | 2011-2013           | <sup>5</sup>  |
| Senegal       | Pikine                   | 2011-2013           | <sup>5</sup>  |
| South Africa  | Pietermaritzburg         | 2012-2014           | <sup>5</sup>  |
| Sudan         | East Wad Medani          | 2012-2013           | <sup>5</sup>  |
| Tanzania      | Pemba Island             | 2010-2012           | <sup>18</sup> |
| Tanzania      | Moshi urban, Moshi rural | 2011-2013           | <sup>5</sup>  |

329

330

331

332

333

334

335

336

337

338

339

340

341

342

## 343 References

- 344 1. Antillón, M. *et al.* The burden of typhoid fever in low- and middle-income countries:  
345 A meta-regression approach. *PLOS Neglected Tropical Diseases* **11**, e0005376 (2017).
- 346 2. Kim, J.-H., Mogasale, V., Im, J., Ramani, E. & Marks, F. Updated estimates of typhoid  
347 fever burden in sub-Saharan Africa. *The Lancet Global Health* **5**, e969 (2017).
- 348 3. Mogasale, V. *et al.* Burden of typhoid fever in low-income and middle-income  
349 countries: a systematic, literature-based update with risk-factor adjustment. *The Lancet*  
350 *Global Health* **2**, e570–e580 (2014).
- 351 4. Crump, J. A., Luby, S. P. & Mintz, E. D. The global burden of typhoid fever. *Bull World*  
352 *Health Organ* **82**, 346–353 (2004).
- 353 5. Marks, F. *et al.* Incidence of invasive salmonella disease in sub-Saharan Africa: a  
354 multicentre population-based surveillance study. *The Lancet Global Health* **5**, e310–e323  
355 (2017).
- 356 6. Stanaway, J. D. *et al.* The global burden of typhoid and paratyphoid fevers: a  
357 systematic analysis for the Global Burden of Disease Study 2017. *The Lancet Infectious*  
358 *Diseases* **19**, 369–381 (2019).
- 359 7. Ali, E. *et al.* Localised transmission hotspots of a typhoid fever outbreak in the  
360 Democratic Republic of Congo. *Pan Afr Med J* **28**, 179 (2017).
- 361 8. Polonsky, J. A. *et al.* Descriptive epidemiology of typhoid fever during an epidemic in  
362 Harare, Zimbabwe, 2012. *PLoS One* **9**, e114702 (2014).
- 363 9. Cruz Espinoza, L. M. *et al.* Variations of Invasive Salmonella Infections by Population  
364 Size in Asante Akim North Municipal, Ghana. *Clin Infect Dis* **62 Suppl 1**, S17-22 (2016).
- 365 10. Ismail, K., Maiga, G., Ssebuggwawo, D., Nabende, P. & Mansourian, A. Spatio-  
366 temporal trends and distribution patterns of typhoid disease in Uganda from 2012 to 2017.  
367 *Geospatial Health* **15**, (2020).
- 368 11. Tamrakar, D. *et al.* Spatial Heterogeneity of Enteric Fever in 2 Diverse Communities  
369 in Nepal. *Clinical Infectious Diseases* **71**, S205–S213 (2020).
- 370 12. Osei, F. B., Stein, A. & Nyadanu, S. D. Spatial and temporal heterogeneities of district-  
371 level typhoid morbidities in Ghana: A requisite insight for informed public health response.  
372 *PLoS One* **13**, e0208006 (2018).
- 373 13. Breiman, R. F. *et al.* Population-Based Incidence of Typhoid Fever in an Urban  
374 Informal Settlement and a Rural Area in Kenya: Implications for Typhoid Vaccine Use in  
375 Africa. *PLoS ONE* **7**, e29119 (2012).
- 376 14. Kim, J.-H. *et al.* A Systematic Review of Typhoid Fever Occurrence in Africa. *Clin*  
377 *Infect Dis* **69**, S492–S498 (2019).
- 378 15. Kim, J.-H. Occurrence of human infection with Salmonella Typhi in sub-Saharan  
379 Africa. [https://github.com/kimfinale/typhoid\\_occurrence](https://github.com/kimfinale/typhoid_occurrence) (2023).
- 380 16. Guiraud, I. *et al.* Population-based incidence, seasonality and serotype distribution of  
381 invasive salmonellosis among children in Nanoro, rural Burkina Faso. *PLOS ONE* **12**, e0178577  
382 (2017).
- 383 17. Nielsen, M. V. *et al.* Incidence and Characteristics of Bacteremia among Children in  
384 Rural Ghana. *PLOS ONE* **7**, e44063 (2012).
- 385 18. Thriemer, K. *et al.* The Burden of Invasive Bacterial Infections in Pemba, Zanzibar.  
386 *PLOS ONE* **7**, e30350 (2012).
- 387

388

389

390
